# Supplementary material
Source: PubMed Central journal article supplement (PMC2638854)
Supplement: ern168_1.pdf [file ern168_1.pdf]

Table S1. Primers used for quantitative real time RT-PCR assays.

| Target gene                                | Primer sequence                                                        | Amplicon size (bp) |
|--------------------------------------------|------------------------------------------------------------------------|--------------------|
| At5g60390<br>elongation factor             | F: 5'-TGAGCACGCTCTTCTTGCTTTCA-3'<br>R: 5'-GGTGGTGGCATCCATCTTGTTACA-3'  | 76                 |
| At4g14400<br>ankyrin repeat family protein | F: 5'-ACTGAAGAGAGTGAGGGACTGAAT-3'<br>R: 5'-AGACAGGTAGCCATCTCCAAATAG-3' | 107                |
| At4g16890<br>disease resistance protein    | F: 5'-AGTCTCAAGGAGATGAATTTGAGG-3'<br>R: 5'-CTAATTCCTCGAGGTTTATGGCTA-3' | 85                 |
| At1g17870<br>expressed protein             | F: 5'-CGTTATTCGACATCCCAGTAGCC-3'<br>R: 5'-CCATCAGATATAAACGCAGCTGC-3'   | 85                 |
| At3g22231<br>expressed protein             | F: 5'-AACTCCAAGGGCGTCAACC-3'<br>R: 5'-CCGCAGCAGAAGATACACTCC-3'         | 74                 |
| At1g78370<br>glutathione S-transferase     | F: 5'-TTGGTAACTTTAGCATCGAGTCAG-3'<br>R: 5'-ATGCAACAATCTTCTCAGAGTCAG-3' | 114                |
| At2g32160<br>expressed protein             | F: 5'-GACCTCTGTTGTATCACTTTGCAG-3'<br>R: 5'-ACATCCTCCAAACTTAGCTCAATC-3' | 76                 |
| At2g14610<br>pathogenesis-related protein  | F: 5'-GCAGACTCATACTCTGGTGG-3'<br>R: 5'-ACTCCATTGCACGTGTTTCGCAG-3'      | 139                |
