# Supplementary material
Source: PubMed Central journal article supplement (PMC2638854)
Supplement: ern168_2.pdf [file ern168_2.pdf]

Table S2. *Arabidopsis thaliana* genes significantly ( $P \leq 0.05$ ) up-regulated ( $\geq 2$ -fold) after 6 h of exposure to fagomine (A), gallic acid (B), or rutin (C) in the aquaculture medium.

| A  | Systematic  | Fold-change | ID Affymetrix | Description                                                                                                       |
|----|-------------|-------------|---------------|-------------------------------------------------------------------------------------------------------------------|
| 1  | 258675_at   | 7.45        | At3g08770     | lipid transfer protein 6 (LTP6)                                                                                   |
| 2  | 266385_at   | 4.06        | At2g14610     | pathogenesis-related protein 1 (PR-1)                                                                             |
| 3  | 260745_at   | 3.99        | At1g78370     | glutathione S-transferase, putative                                                                               |
| 4  | 255517_at   | 3.95        | At4g02290     | glycosyl hydrolase family 9 protein                                                                               |
| 5  | 248048_at   | 3.72        | At5g56080     | nicotianamine synthase, putative                                                                                  |
| 6  | 266222_at   | 3.51        | At2g28780     | expressed protein                                                                                                 |
| 7  | 245265_at   | 3.44        | At4g14400     | ankyrin repeat family protein                                                                                     |
| 8  | 264100_at   | 3.41        | At1g78970     | lupeol synthase (LUP1) / 2,3-oxidosqualene-triterpenoid cyclase                                                   |
| 9  | 255891_at   | 3.17        | At1g17870     | expressed protein                                                                                                 |
| 10 | 259640_at   | 3.15        | At1g52400     | glycosyl hydrolase family 1 protein / beta-glucosidase, putative (BG1)                                            |
| 11 | 265698_at   | 3.09        | At2g32160     | expressed protein                                                                                                 |
| 12 | 260693_at   | 2.96        | At1g32450     | proton-dependent oligopeptide transport (POT) family protein                                                      |
| 13 | 264319_at   | 2.87        | At1g04110     | subtilase family protein                                                                                          |
| 14 | 264377_at   | 2.85        | At2g25060     | plastocyanin-like domain-containing protein                                                                       |
| 15 | 250764_at   | 2.80        | At5g05960     | protease inhibitor/seed storage/lipid transfer protein (LTP) family protein                                       |
| 16 | 257947_at   | 2.79        | At3g21720     | isocitrate lyase, putative                                                                                        |
| 17 | 262109_at   | 2.72        | At1g02730     | cellulose synthase family protein                                                                                 |
| 18 | 259871_at   | 2.70        | At1g76800     | nodulin, putative                                                                                                 |
| 19 | 259766_at   | 2.67        | At1g64360     | expressed protein                                                                                                 |
| 20 | 262218_at   | 2.66        | At1g74760     | zinc finger (C3HC4-type RING finger) family protein                                                               |
| 21 | 249894_at   | 2.63        | At5g22580     | expressed protein                                                                                                 |
| 22 | 247685_at   | 2.52        | At5g59680     | leucine-rich repeat protein kinase, putative                                                                      |
| 23 | 264802_at   | 2.51        | At1g08560     | syntaxin-related protein KNOLLE (KN) / syntaxin 111 (SYP111)                                                      |
| 24 | 262312_at   | 2.50        | At1g70830     | Bet v I allergen family protein                                                                                   |
| 25 | 264087_at   | 2.50        | At2g31330     | expressed protein                                                                                                 |
| 26 | 259563_s_at | 2.49        | At1g20590     | cyclin, putative /// cyclin, putative                                                                             |
| 27 | 250471_at   | 2.48        | At5g10170     | inositol-3-phosphate synthase, putative / myo-inositol-1-phosphate synthase, putative / MI-1-P synthase, putative |
| 28 | 252860_at   | 2.46        | At4g39790     | expressed protein                                                                                                 |
| 29 | 256497_at   | 2.46        | At1g31580     | expressed protein                                                                                                 |
| 30 | 256145_at   | 2.45        | At1g48750     | protease inhibitor/seed storage/lipid transfer protein (LTP) family protein                                       |
| 31 | 263913_at   | 2.42        | At2g36570     | leucine-rich repeat transmembrane protein kinase, putative                                                        |
| 32 | 250942_at   | 2.42        | At5g03350     | legume lectin family protein                                                                                      |
| 33 | 245739_at   | 2.40        | At1g44110     | cyclin, putative                                                                                                  |
| 34 | 263031_at   | 2.35        | At1g24070     | glycosyl transferase family 2 protein                                                                             |
| 35 | 245688_at   | 2.35        | At1g28290     | pollen Ole e 1 allergen and extensin family protein                                                               |
| 36 | 245696_at   | 2.32        | At5g04190     | phytochrome kinase substrate-related                                                                              |
| 37 | 264880_at   | 2.32        | At1g61210     | WD-40 repeat family protein / katanin p80 subunit, putative                                                       |
| 38 | 260364_at   | 2.32        | At1g70560     | alliinase C-terminal domain-containing protein                                                                    |
| 39 | 249890_at   | 2.32        | At5g22570     | WRKY family transcription factor                                                                                  |

|    |             |      |           |                                                                                                  |
|----|-------------|------|-----------|--------------------------------------------------------------------------------------------------|
| 40 | 250517_at   | 2.31 | At5g08260 | serine carboxypeptidase S10 family protein                                                       |
| 41 | 263034_at   | 2.29 | At1g24020 | Bet v I allergen family protein                                                                  |
| 42 | 264025_at   | 2.26 | At2g21050 | amino acid permease, putative                                                                    |
| 43 | 254153_at   | 2.24 | At4g24450 | starch excess protein-related                                                                    |
| 44 | 256647_at   | 2.23 | At3g13610 | oxidoreductase, 2OG-Fe(II) oxygenase family protein                                              |
| 45 | 257300_at   | 2.21 | At3g28080 | nodulin MtN21 family protein                                                                     |
| 46 | 247765_at   | 2.21 | At5g58860 | cytochrome P450 86A1 (CYP86) (CYP86A1) / CYPLXXXVI / P450-dependent fatty acid omega-hydroxylase |
| 47 | 251012_at   | 2.20 | At5g02580 | expressed protein                                                                                |
| 48 | 259609_at   | 2.20 | At1g52410 | caldesmon-related                                                                                |
| 49 | 259561_at   | 2.20 | At1g21250 | wall-associated kinase 1 (WAK1)                                                                  |
| 50 | 256125_at   | 2.19 | At1g18250 | thaumatin, putative                                                                              |
| 51 | 263120_at   | 2.16 | At1g78490 | cytochrome P450 family protein                                                                   |
| 52 | 258067_at   | 2.15 | At3g25980 | mitotic spindle checkpoint protein, putative (MAD2)                                              |
| 53 | 251293_at   | 2.14 | At3g61930 | expressed protein                                                                                |
| 54 | 259481_at   | 2.13 | At1g18970 | germin-like protein (GLP1) (GLP4)                                                                |
| 55 | 267645_at   | 2.13 | At2g32860 | glycosyl hydrolase family 1 protein                                                              |
| 56 | 266421_at   | 2.12 | At2g38540 | nonspecific lipid transfer protein 1 (LTP1)                                                      |
| 57 | 256766_at   | 2.12 | At3g22231 | expressed protein                                                                                |
| 58 | 254202_at   | 2.11 | At4g24140 | hydrolase, alpha/beta fold family protein                                                        |
| 59 | 260540_at   | 2.11 | At2g43500 | RWP-RK domain-containing protein                                                                 |
| 60 | 260867_at   | 2.11 | At1g43790 | expressed protein                                                                                |
| 61 | 249659_s_at | 2.10 | At5g36710 | expressed protein /// expressed protein                                                          |
| 62 | 247425_at   | 2.10 | At5g62550 | expressed protein                                                                                |
| 63 | 265117_at   | 2.08 | At1g62500 | protease inhibitor/seed storage/lipid transfer protein (LTP) family protein                      |
| 64 | 266708_at   | 2.07 | At2g03200 | aspartyl protease family protein                                                                 |
| 65 | 245451_at   | 2.07 | At4g16890 | disease resistance protein (TIR-NBS-LRR class), putative                                         |
| 66 | 265611_at   | 2.07 | At2g25510 | expressed protein                                                                                |
| 67 | 258859_at   | 2.06 | At3g02120 | hydroxyproline-rich glycoprotein family protein                                                  |
| 68 | 252441_at   | 2.05 | At3g46780 | expressed protein                                                                                |
| 69 | 247074_at   | 2.05 | At5g66590 | allergen V5/Tpx-1-related family protein                                                         |
| 70 | 262373_at   | 2.05 | At1g73120 | expressed protein                                                                                |
| 71 | 245734_at   | 2.04 | At1g73480 | hydrolase, alpha/beta fold family protein                                                        |
| 72 | 250446_at   | 2.04 | At5g10770 | chloroplast nucleoid DNA-binding protein, putative                                               |
| 73 | 250228_at   | 2.03 | At5g13840 | WD-40 repeat family protein                                                                      |
| 74 | 251276_at   | 2.03 | At3g61740 | PHD finger family protein (ATX3)                                                                 |
| 75 | 262467_at   | 2.02 | At1g50240 | armadillo/beta-catenin repeat family protein                                                     |
| 76 | 266817_at   | 2.00 | At2g44960 | zinc finger (C3HC4-type RING finger) family protein                                              |
| 77 | 253344_at   | 2.00 | At4g33550 | protease inhibitor/seed storage/lipid transfer protein (LTP) family protein                      |
| 78 | 252638_at   | 2.00 | At3g44540 | acyl CoA reductase, putative                                                                     |
| 79 | 248382_at   | 2.00 | At5g51890 | peroxidase-related                                                                               |
| 80 | 252888_at   | 2.00 | At4g39210 | glucose-1-phosphate adenyltransferase large subunit 3 (APL3) / ADP-glucose pyrophosphorylase     |
| 81 | 248309_at   | 2.00 | At5g52540 | expressed protein                                                                                |
| 82 | 258419_at   | 2.00 | At3g16670 | expressed protein                                                                                |
| 83 | 260463_at   | 2.00 | At1g10930 | DNA helicase (RECQ14A)                                                                           |

|    |           |      |           |                                                                                                          |
|----|-----------|------|-----------|----------------------------------------------------------------------------------------------------------|
| 84 | 251695_at | 2.00 | At3g56585 | hydroxyproline-rich glycoprotein family protein                                                          |
| 85 | 245555_at | 2.00 | At4g15390 | transferase family protein                                                                               |
| 86 | 260192_at | 2.00 | At1g67630 | DNA polymerase alpha subunit B family                                                                    |
| 87 | 255782_at | 2.00 | At1g19850 | transcription factor MONOPTEROS (MP) / auxin-responsive protein (IAA24) / auxin response factor 5 (ARF5) |
| 88 | 252943_at | 2.00 | At4g39330 | mannitol dehydrogenase, putative                                                                         |
| 89 | 253510_at | 2.00 | At4g31730 | expressed protein                                                                                        |
| 90 | 265962_at | 2.00 | At2g37460 | nodulin MtN21 family protein                                                                             |
| 91 | 264763_at | 2.00 | At1g61450 | expressed protein                                                                                        |
| 92 | 249320_at | 2.00 | At5g40910 | disease resistance protein (TIR-NBS-LRR class), putative                                                 |
| 93 | 258471_at | 2.00 | At3g06030 | NPK1-related protein kinase, putative (ANP3)                                                             |
| 94 | 259166_at | 2.00 | At3g01670 | expressed protein                                                                                        |

| <b>B</b> | <b>Systematic</b> | <b>Fold-change</b> | <b>ID_Affymetrix</b> | <b>Gene Title_Affymetrix</b>                                                    |
|----------|-------------------|--------------------|----------------------|---------------------------------------------------------------------------------|
| 1        | 250351_at         | 15.57              | At5g12030            | 17.7 kDa class II heat shock protein 17.6A (HSP17.7-CII)                        |
| 2        | 250296_at         | 10.33              | At5g12020            | 17.6 kDa class II heat shock protein (HSP17.6-CII)                              |
| 3        | 252515_at         | 6.57               | At3g46230            | 17.4 kDa class I heat shock protein (HSP17.4-CI)                                |
| 4        | 265221_s_at       | 5.91               | At2g02010            | glutamate decarboxylase, putative /// glutamate decarboxylase, putative         |
| 5        | 248657_at         | 5.58               | At5g48570            | peptidyl-prolyl cis-trans isomerase, putative / FK506-binding protein, putative |
| 6        | 248332_at         | 5.36               | At5g52640            | heat shock protein 81-1 (HSP81-1) / heat shock protein 83 (HSP83)               |
| 7        | 256245_at         | 5.08               | At3g12580            | heat shock protein 70, putative / HSP70, putative                               |
| 8        | 266294_at         | 4.63               | At2g29500            | 17.6 kDa class I small heat shock protein (HSP17.6B-CI)                         |
| 9        | 260248_at         | 4.53               | At1g74310            | heat shock protein 101 (HSP101)                                                 |
| 10       | 263150_at         | 4.22               | At1g54050            | 17.4 kDa class III heat shock protein (HSP17.4-CIII)                            |
| 11       | 254326_at         | 3.86               | At4g22610            | protease inhibitor/seed storage/lipid transfer protein (LTP) family protein     |
| 12       | 250500_at         | 3.73               | At5g09530            | hydroxyproline-rich glycoprotein family protein                                 |
| 13       | 245451_at         | 3.72               | At4g16890            | disease resistance protein (TIR-NBS-LRR class), putative                        |
| 14       | 266992_at         | 3.56               | At2g39200            | seven transmembrane MLO family protein / MLO-like protein 12 (MLO12)            |
| 15       | 256169_at         | 3.47               | At1g51800            | leucine-rich repeat protein kinase, putative                                    |
| 16       | 259447_s_at       | 3.29               | At1g02430            | ADP-ribosylation factor, putative                                               |
| 17       | 246944_at         | 3.11               | At5g25450            | ubiquinol-cytochrome C reductase complex 14 kDa protein, putative               |
| 18       | 259120_at         | 3.10               | At3g02240            | expressed protein                                                               |
| 19       | 248118_at         | 3.05               | At5g55050            | GDSL-motif lipase/hydrolase family protein                                      |
| 20       | 251895_at         | 2.98               | At3g54420            | class IV chitinase (CHIV)                                                       |
| 21       | 254832_at         | 2.91               | At4g12490            | protease inhibitor/seed storage/lipid transfer protein (LTP) family protein     |
| 22       | 256170_at         | 2.90               | At1g51790            | leucine-rich repeat protein kinase, putative                                    |
| 23       | 257919_at         | 2.87               | At3g23250            | myb family transcription factor (MYB15)                                         |
| 24       | 266368_at         | 2.85               | At2g41380            | embryo-abundant protein-related                                                 |
| 25       | 251513_at         | 2.82               | At3g59220            | pirin, putative                                                                 |
| 26       | 264213_at         | 2.81               | At1g65400            | disease resistance protein (TIR class), putative                                |
| 27       | 266010_at         | 2.80               | At2g37430            | zinc finger (C2H2 type) family protein (ZAT11)                                  |
| 28       | 255891_at         | 2.77               | At1g17870            | expressed protein                                                               |
| 29       | 247360_at         | 2.74               | At5g63450            | cytochrome P450, putative                                                       |
| 30       | 259681_at         | 2.70               | At1g77760            | nitrate reductase 1 (NR1)                                                       |
| 31       | 245181_at         | 2.69               | At5g12420            | expressed protein                                                               |

|    |             |      |           |                                                                                                   |
|----|-------------|------|-----------|---------------------------------------------------------------------------------------------------|
| 32 | 256181_at   | 2.69 | At1g51820 | leucine-rich repeat protein kinase, putative                                                      |
| 33 | 254839_at   | 2.63 | At4g12400 | stress-inducible protein, putative                                                                |
| 34 | 249197_at   | 2.61 | At5g42380 | calmodulin-related protein, putative                                                              |
| 35 | 266743_at   | 2.57 | At2g02990 | ribonuclease 1 (RNS1)                                                                             |
| 36 | 247431_at   | 2.56 | At5g62520 | expressed protein                                                                                 |
| 37 | 261838_at   | 2.54 | At1g16030 | heat shock protein 70, putative / HSP70, putative                                                 |
| 38 | 267165_at   | 2.51 | At2g37710 | lectin protein kinase, putative                                                                   |
| 39 | 259381_s_at | 2.41 | At3g16390 | jacalin lectin family protein /// jacalin lectin family protein /// jacalin lectin family protein |
| 40 | 255549_at   | 2.40 | At4g01950 | phospholipid/glycerol acyltransferase family protein                                              |
| 41 | 249773_at   | 2.40 | At5g24140 | squalene monooxygenase 2 / squalene epoxidase 2 (SQP2)                                            |
| 42 | 262518_at   | 2.40 | At1g17170 | glutathione S-transferase, putative                                                               |
| 43 | 246597_at   | 2.37 | At5g14760 | L-aspartate oxidase family protein                                                                |
| 44 | 248700_at   | 2.33 | At5g48400 | glutamate receptor family protein (GLR1.2)                                                        |
| 45 | 254314_at   | 2.33 | At4g22470 | protease inhibitor/seed storage/lipid transfer protein (LTP) family protein                       |
| 46 | 266165_at   | 2.32 | At2g28190 | superoxide dismutase (Cu-Zn), chloroplast (SODCP) / copper/zinc superoxide dismutase (CSD2)       |
| 47 | 252624_at   | 2.31 | At3g44735 | phytosulfokines-related                                                                           |
| 48 | 245760_s_at | 2.27 | At1g66920 | protein kinase, putative /// protein kinase, putative                                             |
| 49 | 245265_at   | 2.27 | At4g14400 | ankyrin repeat family protein                                                                     |
| 50 | 246228_at   | 2.26 | At4g36430 | peroxidase, putative                                                                              |
| 51 | 261570_at   | 2.25 | At1g01120 | fatty acid elongase 3-ketoacyl-CoA synthase 1 (KCS1)                                              |
| 52 | 266385_at   | 2.25 | At2g14610 | pathogenesis-related protein 1 (PR-1)                                                             |
| 53 | 266752_at   | 2.24 | At2g47000 | multidrug resistant (MDR) ABC transporter, putative                                               |
| 54 | 254453_at   | 2.24 | At4g21120 | amino acid permease family protein                                                                |
| 55 | 248381_at   | 2.22 | At5g51830 | pfkB-type carbohydrate kinase family protein                                                      |
| 56 | 260234_at   | 2.22 | At1g74460 | GDSL-motif lipase/hydrolase family protein                                                        |
| 57 | 256787_at   | 2.20 | At3g13790 | beta-fructosidase (BFRUCT1) / beta-fructofuranosidase / cell wall invertase                       |
| 58 | 260551_at   | 2.20 | At2g43510 | trypsin inhibitor, putative                                                                       |
| 59 | 263098_at   | 2.18 | At2g16005 | MD-2-related lipid recognition domain-containing protein / ML domain-containing protein           |
| 60 | 263231_at   | 2.18 | At1g05680 | UDP-glucuronosyl/UDP-glucosyl transferase family protein                                          |
| 61 | 265922_at   | 2.17 | At2g18480 | mannitol transporter, putative                                                                    |
| 62 | 260276_at   | 2.16 | At1g80450 | VQ motif-containing protein                                                                       |
| 63 | 262045_at   | 2.13 | At1g80240 | expressed protein                                                                                 |
| 64 | 245928_s_at | 2.12 | At5g24780 | vegetative storage protein 2 (VSP2) /// vegetative storage protein 2 (VSP2)                       |
| 65 | 247444_at   | 2.12 | At5g62630 | expressed protein                                                                                 |
| 66 | 256766_at   | 2.12 | At3g22231 | expressed protein                                                                                 |
| 67 | 259297_at   | 2.10 | At3g05360 | disease resistance family protein / LRR family protein                                            |
| 68 | 256576_at   | 2.08 | At3g28210 | zinc finger (AN1-like) family protein                                                             |
| 69 | 250200_at   | 2.08 | At5g14130 | peroxidase, putative                                                                              |
| 70 | 250670_at   | 2.07 | At5g06860 | polygalacturonase inhibiting protein 1 (PGIP1)                                                    |
| 71 | 252487_at   | 2.07 | At3g46660 | UDP-glucuronosyl/UDP-glucosyl transferase family protein                                          |
| 72 | 253046_at   | 2.07 | At4g37370 | cytochrome P450, putative                                                                         |
| 73 | 253535_at   | 2.05 | At4g31550 | WRKY family transcription factor                                                                  |
| 74 | 261073_at   | 2.05 | At1g07300 | josephin protein-related                                                                          |
| 75 | 259478_at   | 2.05 | At1g18980 | germin-like protein, putative                                                                     |

|    |             |      |           |                                                                                           |
|----|-------------|------|-----------|-------------------------------------------------------------------------------------------|
| 76 | 258133_at   | 2.05 | At3g24500 | ethylene-responsive transcriptional coactivator, putative                                 |
| 77 | 260745_at   | 2.04 | At1g78370 | glutathione S-transferase, putative                                                       |
| 78 | 259384_at   | 2.04 | At3g16450 | jacalin lectin family protein                                                             |
| 79 | 245352_at   | 2.02 | At4g15490 | UDP-glucuronosyl/UDP-glucosyl transferase family protein                                  |
| 80 | 254243_at   | 2.02 | At4g23210 | protein kinase family protein                                                             |
| 81 | 263800_at   | 2.00 | At2g24600 | ankyrin repeat family protein                                                             |
| 82 | 265698_at   | 2.00 | At2g32160 | expressed protein                                                                         |
| 83 | 254416_at   | 2.00 | At4g21380 | S-locus protein kinase, putative (ARK3)                                                   |
| 84 | 264153_at   | 2.00 | At1g65390 | disease resistance protein (TIR class), putative                                          |
| 85 | 254767_s_at | 2.00 | At4g13290 | cytochrome P450 71A19, putative (CYP71A19) /// cytochrome P450 71A19, putative (CYP71A19) |

| C  | Systematic  | Fold-change | ID_Affymetrix | Gene Title_Affymetrix                                                       |
|----|-------------|-------------|---------------|-----------------------------------------------------------------------------|
| 1  | 245265_at   | 3.56        | At4g14400     | ankyrin repeat family protein                                               |
| 2  | 258675_at   | 3.38        | At3g08770     | lipid transfer protein 6 (LTP6)                                             |
| 3  | 252225_at   | 3.35        | At3g49870     | ADP-ribosylation factor, putative                                           |
| 4  | 248048_at   | 3.12        | At5g56080     | nicotianamine synthase, putative                                            |
| 5  | 266385_at   | 2.98        | At2g14610     | pathogenesis-related protein 1 (PR-1)                                       |
| 6  | 245451_at   | 2.98        | At4g16890     | disease resistance protein (TIR-NBS-LRR class), putative                    |
| 7  | 257947_at   | 2.83        | At3g21720     | isocitrate lyase, putative                                                  |
| 8  | 259561_at   | 2.82        | At1g21250     | wall-associated kinase 1 (WAK1)                                             |
| 9  | 255891_at   | 2.71        | At1g17870     | expressed protein                                                           |
| 10 | 260556_at   | 2.64        | At2g43620     | chitinase, putative                                                         |
| 11 | 256766_at   | 2.59        | At3g22231     | expressed protein                                                           |
| 12 | 255111_at   | 2.55        | At4g08780     | peroxidase, putative                                                        |
| 13 | 265698_at   | 2.53        | At2g32160     | expressed protein                                                           |
| 14 | 247685_at   | 2.45        | At5g59680     | leucine-rich repeat protein kinase, putative                                |
| 15 | 251695_at   | 2.31        | At3g56585     | hydroxyproline-rich glycoprotein family protein                             |
| 16 | 266190_at   | 2.27        | At2g38850     | guanylate-binding family protein                                            |
| 17 | 259766_at   | 2.18        | At1g64360     | expressed protein                                                           |
| 18 | 258255_at   | 2.18        | At3g26800     | expressed protein                                                           |
| 19 | 250426_at   | 2.16        | At5g10510     | ovule development protein, putative                                         |
| 20 | 260092_at   | 2.16        | At1g73280     | serine carboxypeptidase S10 family protein                                  |
| 21 | 267076_at   | 2.08        | At2g41090     | calmodulin-like calcium-binding protein, 22 kDa (CaBP-22)                   |
| 22 | 245393_at   | 2.07        | At4g16260     | glycosyl hydrolase family 17 protein                                        |
| 23 | 255419_at   | 2.05        | At4g03230     | S-locus lectin protein kinase family protein                                |
| 24 | 255110_at   | 2.04        | At4g08770     | peroxidase, putative                                                        |
| 25 | 260745_at   | 2.00        | At1g78370     | glutathione S-transferase, putative                                         |
| 26 | 256145_at   | 2.00        | At1g48750     | protease inhibitor/seed storage/lipid transfer protein (LTP) family protein |
| 27 | 260118_s_at | 2.00        | At1g33940     | hypothetical protein /// hypothetical protein                               |
| 28 | 266222_at   | 2.00        | At2g28780     | expressed protein                                                           |
